# Supplementary material
Source: PubMed Central journal article supplement (PMC11227122)
Supplement: NIHMS1985545-supplement-PMID__36510002_Supp.pdf [file NIHMS1985545-supplement-PMID__36510002_Supp.pdf]

1 **SUPPLEMENTAL FIGURE LEGENDS**

2

3 **Figure S1: Sequence confirmation, CFTR mRNA, protein and function in 3**

4 **independent ins-35kb clones.** A. Diagram showing the homology-directed repair (HDR)  
5 donor template used for insertion of -35kb enhancer into intron 1 of *CFTR*. Location of the  
6 CRISPR/Cas9 gRNA is noted. Sanger sequencing alignments are shown below for a single  
7 clone #16 (red arrows) indicating sequencing coverage across the modified region. Primers  
8 used for amplification and sequencing are shown in purple. Primers P1 and P2 were used  
9 to generate an amplicon that was used for sequencing with additional primers. B. Sanger  
10 sequencing chromatograms for the three 16HBE14o<sup>-</sup> ins-35kb clones around the region of  
11 the 5' junction between intron 1 and -35kb sequence. Clone #65 chromatogram indicates  
12 sequence variants introduced near the gRNA cut site. C. *CFTR* expression normalized to  
13 *PGK1*, shown relative to 16HBE14o<sup>-</sup> WT cells (n=3). Note: clones #16 and #65 were  
14 averaged for presentation in Figure 1C. \*\*\*\* denotes P< .0001 and \*\* denotes P<0.01  
15 compared to 16HBE14o<sup>-</sup> Δ-35kb cells using an unpaired t-test. D. CFTR protein expression  
16 by western blot analysis, normalized to β-tubulin, highlighting additional CFTR isoforms in  
17 the multicopy insertion clone #26 and single copy clone #65. E. Representative traces of  
18 short-circuit current in 16HBE14o<sup>-</sup> -derived clones. Cells grown on permeable filters with  
19 apical and basolateral media. CFTR function was assessed in Ussing chambers. At the  
20 indicated times amiloride (Amil, 100 μM, apical), forskolin (For, 10 μM, basolateral), and  
21 Inh-172 (10 μM, apical) were added.

22

23 **Figure S2: *CFTR* splicing and copy number assessment in 16HBE14o<sup>-</sup> ins-35kb clones.**

24 A. Multiplex PCR to examine copy number of -35kb in 16HBE14o<sup>-</sup> WT and modified cells.  
25 Products run on an 8% polyacrylamide gel, with an amplicon in *CFTR* intron 11 (250bp)  
26 serving as control to which the amplicon for -35kb (164bp) is compared. According to this  
27 ratio, clone #26 has more -35kb product than clones #16, #65 and WT, suggesting a higher  
28 allele number. NT: no template PCR control. B. Comparison of *CFTR* cDNA amplicons using  
29 RT-PCR, with a primer set encompassing the 5'UTR through exon 6. cDNA was synthesized  
30 with random hexamers and products separated on a 1.5% agarose gel. A WT *CFTR* product  
31 size of 667bp is detected for all samples with the exception of 16HBE14o<sup>-</sup> Δ-35kb, which  
32 expresses very low *CFTR* as expected ((19)) (Figure 1C, Figure S1C). -RT: no reverse  
33 transcriptase control cDNA, NT: no template PCR control. C. Diagram of *CFTR* cDNA with  
34 the locations of the Taqman primer/probe set (Figure 1C and Figure S1C) and A1R/6S1L  
35 primers used for splicing assessment (panel B).

36

37 **Figure S3: Clonal variation in open chromatin and active histone mark occupancy in**

38 **16HBE14o<sup>-</sup> ins-35kb clones.** A. Open chromatin mapping of 16HBE14o<sup>-</sup> Δ-35kb and ins-  
39 35kb clones, mapped to a modified hg19 genome accounting for the -35kb deletion (red  
40 dotted line) and insertion into intron 1 (blue line). Note the peak height at the intron 1  
41 insertion compared to the int10c peak (orange arrows) in 16HBE14o<sup>-</sup> ins-35kb #26 versus  
42 that of clone #16 or #65, indicating more open chromatin at intron 1 in these cells.  
43 H3K27ac (B.) and RNAPII (C.) enrichment in 16HBE14o<sup>-</sup>, 16HBE14o<sup>-</sup> Δ-35kb, and  
44 16HBE14o<sup>-</sup> ins-35kb clones #16, #26 and #65 cells. Data normalized to percent input, with  
45 the chr11p13 region shown as control. B., n=3; C., n=2; \*\*\* denotes P<0.001 compared to

46 16HBE14o<sup>-</sup> enrichment levels at each site using the Holm-Sidak multiple t test (not  
47 significant not shown). Note the higher H3K27ac enrichment at the *CFTR* promoter in  
48 16HBE14o<sup>-</sup> ins-35kb #26 cells compared to clones #16 and #26.

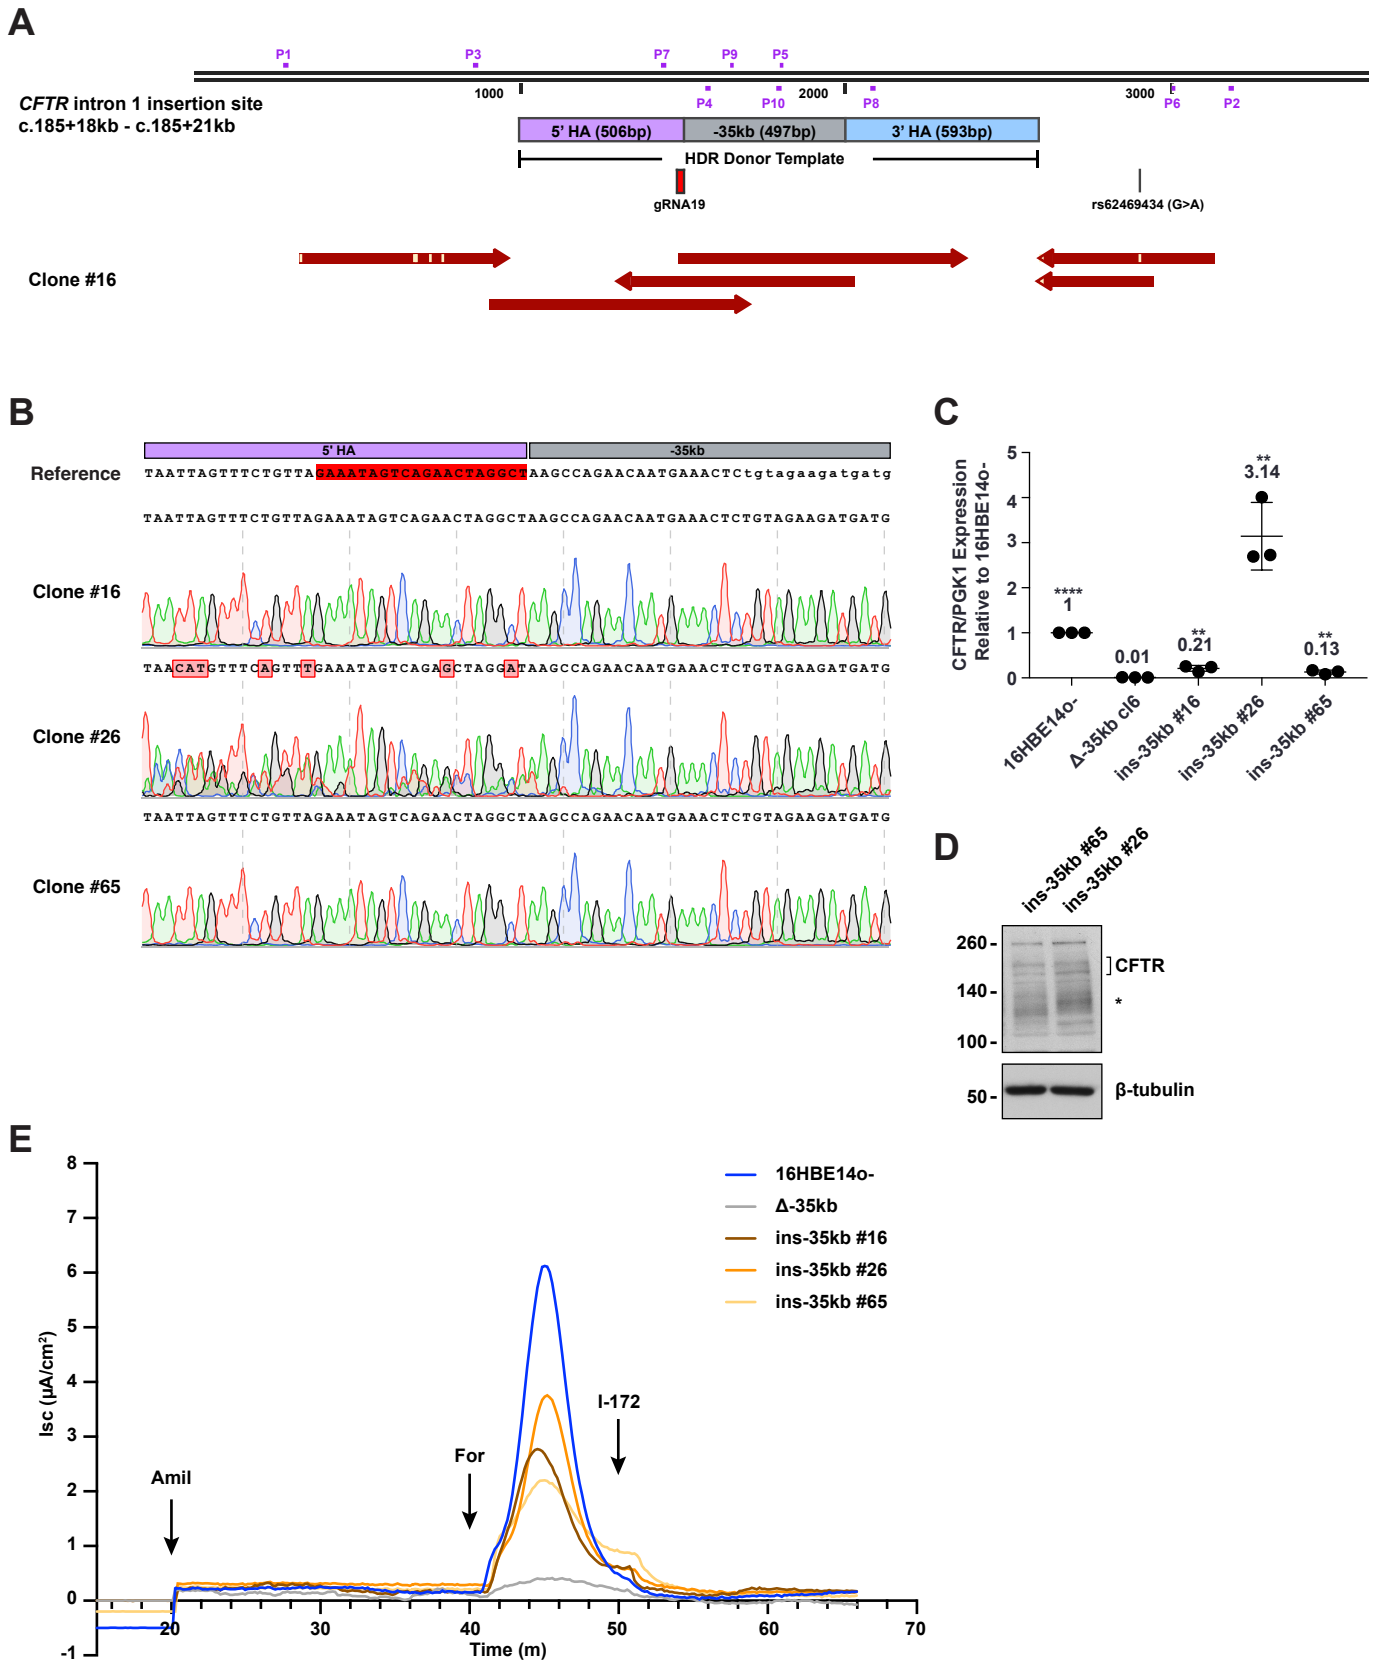

Supplementary Figure 1

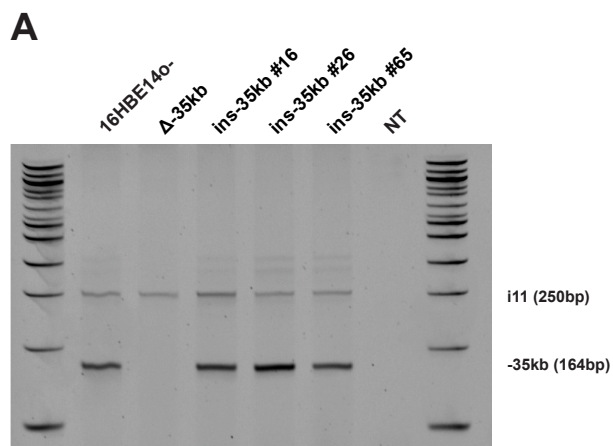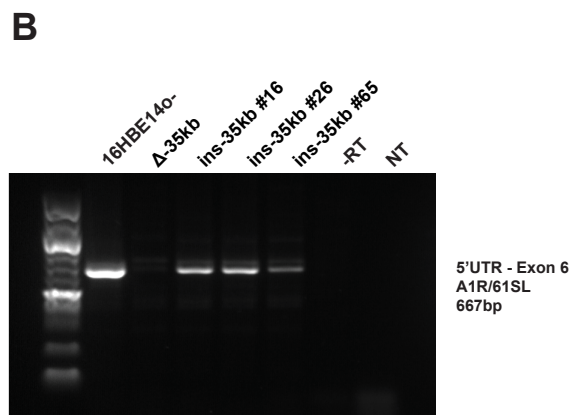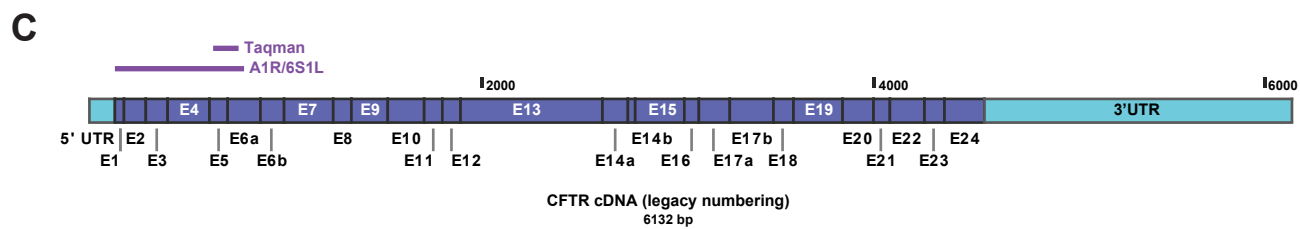

Supplementary Figure 2

**A**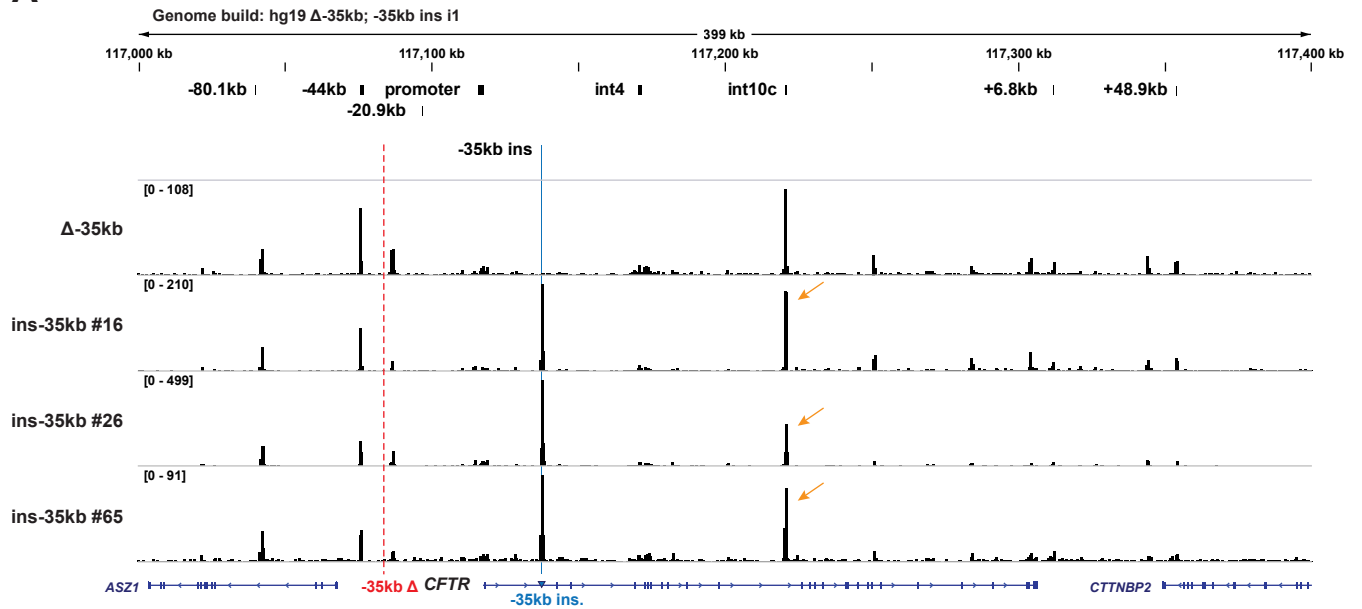**B**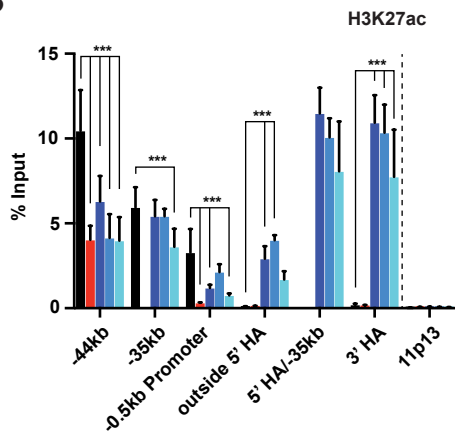**C**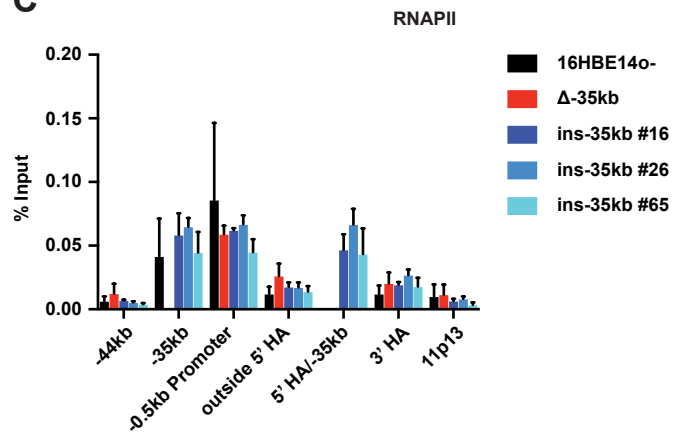

**Table S1: Oligonucleotides**

| <b>Gibson Assembly</b>                        |                                                                                                                                                                                                                                                                                                                                                                                                                                                                                            |                                                                                              |
|-----------------------------------------------|--------------------------------------------------------------------------------------------------------------------------------------------------------------------------------------------------------------------------------------------------------------------------------------------------------------------------------------------------------------------------------------------------------------------------------------------------------------------------------------------|----------------------------------------------------------------------------------------------|
| <b>Region</b>                                 | <b>Forward Sequence (5'&gt;3')</b>                                                                                                                                                                                                                                                                                                                                                                                                                                                         | <b>Reverse Sequence (5'&gt;3')</b>                                                           |
| 5' Intron 1 HA<br>-35kb                       | ATTTGGGAGAAGTGTCAATGCAATTAG<br>gaaatagtgcagaactaggctCCCTAGACCTGTACTTGTATCTTTAAC                                                                                                                                                                                                                                                                                                                                                                                                            | atacaagtacaggtctagggAGCCTAGTCTGACTATTTCTAAC<br>catgagccaccaccacaccATGCTCTTTCGTGGAACCTAGTATTC |
| 3' Intron 1 HA                                | taggttccacgaagagcatGGGTGTGGTGGTGCATGCCTG                                                                                                                                                                                                                                                                                                                                                                                                                                                   | AATATGTCCCATCAGGCCAGGCCG                                                                     |
| <b>Intron 1 Insertion</b>                     |                                                                                                                                                                                                                                                                                                                                                                                                                                                                                            |                                                                                              |
| <b>Name</b>                                   | <b>Sequence (5'&gt;3')</b>                                                                                                                                                                                                                                                                                                                                                                                                                                                                 |                                                                                              |
| CFTR 185 + 17.2kb gBlock                      | TGTACAAAAAAGCAGGCTTTAAAGGAACCAATTCAGTCGACTGGATCCGGTACCAAGGTCGGCAGGAAGAGGGCCTATTTCCCATGATTCCTTCATATTTGCATAT<br>ACGATACAAAGGCTGTAGAGAGATAATTAGAATTAATTTGACTGTAAACACAAAGATATTAGTACAAAATACGTGACGTAGAAAGTAATAATTTCTGGGTAGTTTG<br>CAGTTTTAAAATATGTTTTAAAATGGACTATCATATGCTTACCCTAACTTGAAAGTATTTTCGATTTCTTGGCTTTATATATCTTGTGAAAGGACGAAACACCGGA<br><b>AATAGTCAGAACTAGGCT</b> GTTTTAGAGCTAGAAAATAGCAAGTTAAAATAAGGCTAGTCCGTTATCAACTTGAAAAGTGGCACCAGGATCCGTTCTTTTTCTAGAC<br>CCAGCTTCTTGTACAAAGTTGGCATT |                                                                                              |
| ins-35kb EF                                   | GTGGCCTATTTCAAACCTCATGGC                                                                                                                                                                                                                                                                                                                                                                                                                                                                   |                                                                                              |
| ins-35kb ER                                   | AGCTTATGCTGCCCAACAAT                                                                                                                                                                                                                                                                                                                                                                                                                                                                       |                                                                                              |
| ins-35kb IF                                   | GAGCCACATTTGCCTCTC                                                                                                                                                                                                                                                                                                                                                                                                                                                                         |                                                                                              |
| ins-35kb IR                                   | GAGCTGGAGGATGAAATGGA                                                                                                                                                                                                                                                                                                                                                                                                                                                                       |                                                                                              |
| <b>TaqMan Assay</b>                           |                                                                                                                                                                                                                                                                                                                                                                                                                                                                                            |                                                                                              |
| <b>Gene</b>                                   | <b>Sequence (5'&gt;3')</b>                                                                                                                                                                                                                                                                                                                                                                                                                                                                 |                                                                                              |
| CFTR                                          | AGCTGTCAAGCCGTGTTCTAGATA<br>ATGAGGAGTGCCACTTGCAAA<br>/56-FAM/CACACGAAA/ZEN/TGTGCCAATGCAAGTCCCT/3IABkFQ/<br>TAACAAGCTGACGCTGGAC<br>GCAGCCTTAATCCTCTGGTT                                                                                                                                                                                                                                                                                                                                     |                                                                                              |
| PGK1                                          | /56-JOEN/CGACTCTCA/ZEN/TAACGACCCGCTTCC/3IABkFQ/                                                                                                                                                                                                                                                                                                                                                                                                                                            |                                                                                              |
| <b>ChIP-qPCR</b>                              |                                                                                                                                                                                                                                                                                                                                                                                                                                                                                            |                                                                                              |
| <b>Amplicon Site</b>                          | <b>Forward Sequence (5'&gt;3')</b>                                                                                                                                                                                                                                                                                                                                                                                                                                                         | <b>Reverse Sequence (5'&gt;3')</b>                                                           |
| CFTR -44kb                                    | AGTGAGATTAGTTGTCTCTTTTGGAGATAA                                                                                                                                                                                                                                                                                                                                                                                                                                                             | CCCTTGACTATTTTGTGCACATG                                                                      |
| CFTR -35kb                                    | ATCTACCTTACCCGTCTGCCATT                                                                                                                                                                                                                                                                                                                                                                                                                                                                    | TCTGAATTATCAGCCACAGTCA                                                                       |
| CFTR -0.5kb Promoter<br>outside 5' HA         | GTCTCCCGCCGGTGG                                                                                                                                                                                                                                                                                                                                                                                                                                                                            | CAGTCGCGCCCTCTCTTAG                                                                          |
| 5' HA:-35kb                                   | CTGTGCTCTAGAAGTTTGGG                                                                                                                                                                                                                                                                                                                                                                                                                                                                       | GCCACACAATCTGGATAGTC                                                                         |
| 3' HA                                         | GCCTTAGGGATCTCTGTTTGC                                                                                                                                                                                                                                                                                                                                                                                                                                                                      | TGAAATGGACAGCAGGGTAA                                                                         |
| 11p13                                         | GTGAGAGGGGAAGACAGCAG                                                                                                                                                                                                                                                                                                                                                                                                                                                                       | CAAAGCAGACACCTGGAA                                                                           |
|                                               | TCCCTCCAGGTTTGGCTCC                                                                                                                                                                                                                                                                                                                                                                                                                                                                        | GCCCCAGATCAGGAGAGAGA                                                                         |
| <b>4C-seq</b>                                 |                                                                                                                                                                                                                                                                                                                                                                                                                                                                                            |                                                                                              |
| <b>Viewpoint (enzyme combo.)</b>              | <b>Reading Primer (5'&gt;3')</b>                                                                                                                                                                                                                                                                                                                                                                                                                                                           | <b>Non-reading Primer (5'&gt;3')</b>                                                         |
| DHS -20.9 kb (NlaIII/DpnII)                   | tacacgacgctcttccgatctTTAACAAAGTTAGGTAAATGACCA                                                                                                                                                                                                                                                                                                                                                                                                                                              | actggagttcagacgtgtgctcttccgatctCAAAGTGAGCTATTTGTTTCTC                                        |
| int1+19.5kb (NlaIII/DpnII)                    | tacacgacgctcttccgatctAGGTGTGTCTGCTTTGTCTC                                                                                                                                                                                                                                                                                                                                                                                                                                                  | actggagttcagacgtgtgctcttccgatctGTCTTTGTTGTTGTTG                                              |
| <b>Semi-quantitative Copy Number Analysis</b> |                                                                                                                                                                                                                                                                                                                                                                                                                                                                                            |                                                                                              |
| <b>Primer location</b>                        | <b>Forward Primer (5'&gt;3')</b>                                                                                                                                                                                                                                                                                                                                                                                                                                                           | <b>Reverse Primer (5'&gt;3')</b>                                                             |
| CFTR -35kb                                    | TTCTTCCAATTCCTACCAGCA                                                                                                                                                                                                                                                                                                                                                                                                                                                                      | GAATGTGGCTCAGTTAGAGAC                                                                        |
| CFTR intron 11                                | CCAGCTTTAGGCTTCTTGGT                                                                                                                                                                                                                                                                                                                                                                                                                                                                       | CGCCATATGCCACAAAGCTCTCTCTTGA                                                                 |
| <b>CFTR Splicing Analysis</b>                 |                                                                                                                                                                                                                                                                                                                                                                                                                                                                                            |                                                                                              |
| <b>Primer location</b>                        | <b>Forward Primer (5'&gt;3')</b>                                                                                                                                                                                                                                                                                                                                                                                                                                                           | <b>Reverse Primer (5'&gt;3')</b>                                                             |
| A1R/6S1L                                      | CGAGAGACCATGCAGAGGTC                                                                                                                                                                                                                                                                                                                                                                                                                                                                       | GTAACAACCTCCAGATTAGC                                                                         |
